# Supplementary material for: The Dresden in vivo OCT dataset for automatic middle ear segmentation
Source: PubMed Central journal article supplement (PMC10967373; doi:10.1038/s41597-024-03000-0), 2024-02-26
Supplement: 41597_2024_3000_MOESM2_ESM.pdf [file 41597_2024_3000_MOESM2_ESM.pdf]

# The Dresden in vivo OCT dataset for automatic middle ear segmentation

## Supplementary File 2: Guideline for annotation of sparse landmarks of anatomical structures of the middle ear

### General:

- mark the points that can show the most salient feature of the anatomical structures
- use the 3D view for assistance to orientate oneself
- have the data volume and the segmentation open
- place the points at the surface

### Tympanic membrane:

1. Annulus:
  - delineate the border of the tympanic membrane as closed curve
  - start from the pars flaccida area, but do not include it
  - artifacts need to be avoided, e.g., specks
2. Umbo:
  - deepest point of cone
  - the center point of maximum depression
  - on the outer side of the tympanic membrane

### Malleus:

1. Short process of malleus
  - outer most point
2. malleus handle
  - curve along in 3D (hide tympanic membrane) from umbo to the short process of the malleus after having it orientated as you would look on to it
  - border to TM
  - at least five points due to the curvature of the malleus handle

### Incus:

1. Long Process (proximal → distal)
  - only part of the incus handle is visible
  - nearly parallel to the malleus handle
  - at least two points

### Stapes:

- try to mark the most lateral point
- usually only part of the stapes head is visible
- artifacts and noise
